# Supplementary material
Source: PubMed Central journal article supplement (PMC6892430)
Supplement: NIHMS585133-supplement-supplement_1.pdf [file NIHMS585133-supplement-supplement_1.pdf]

Legends to Figures in online repository

eFig 1. Changes in titers of cat specific IgE are shown with changes in IgG and IgG<sub>4</sub> to Fel d 1 over eight months of decreased exposure in three sensitized subjects, no. 1042 (A), no. 1073 (B), and no. 1015 (C).

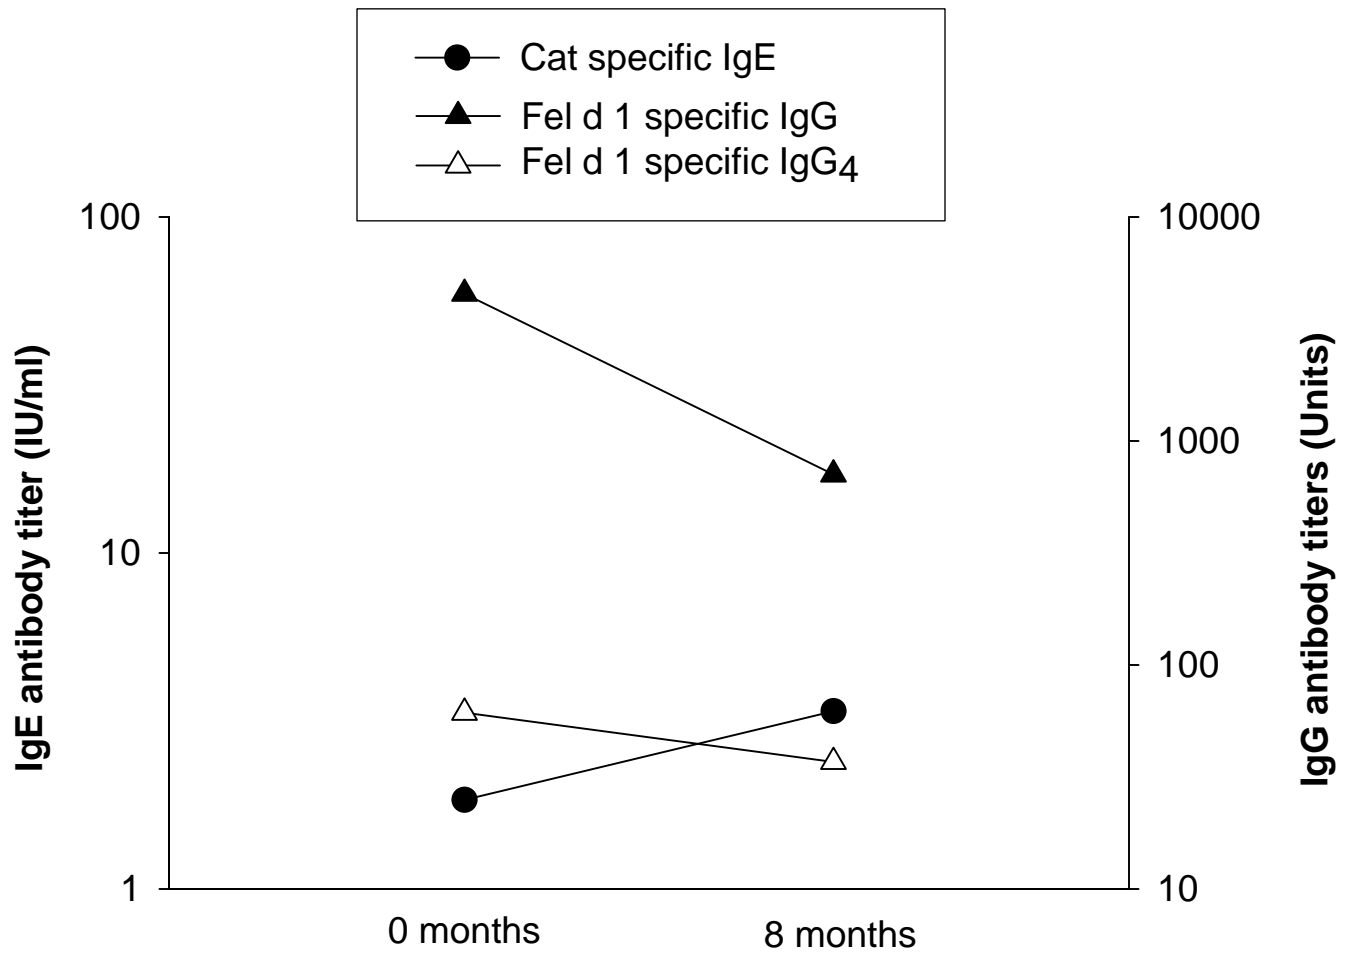

eFig 1A

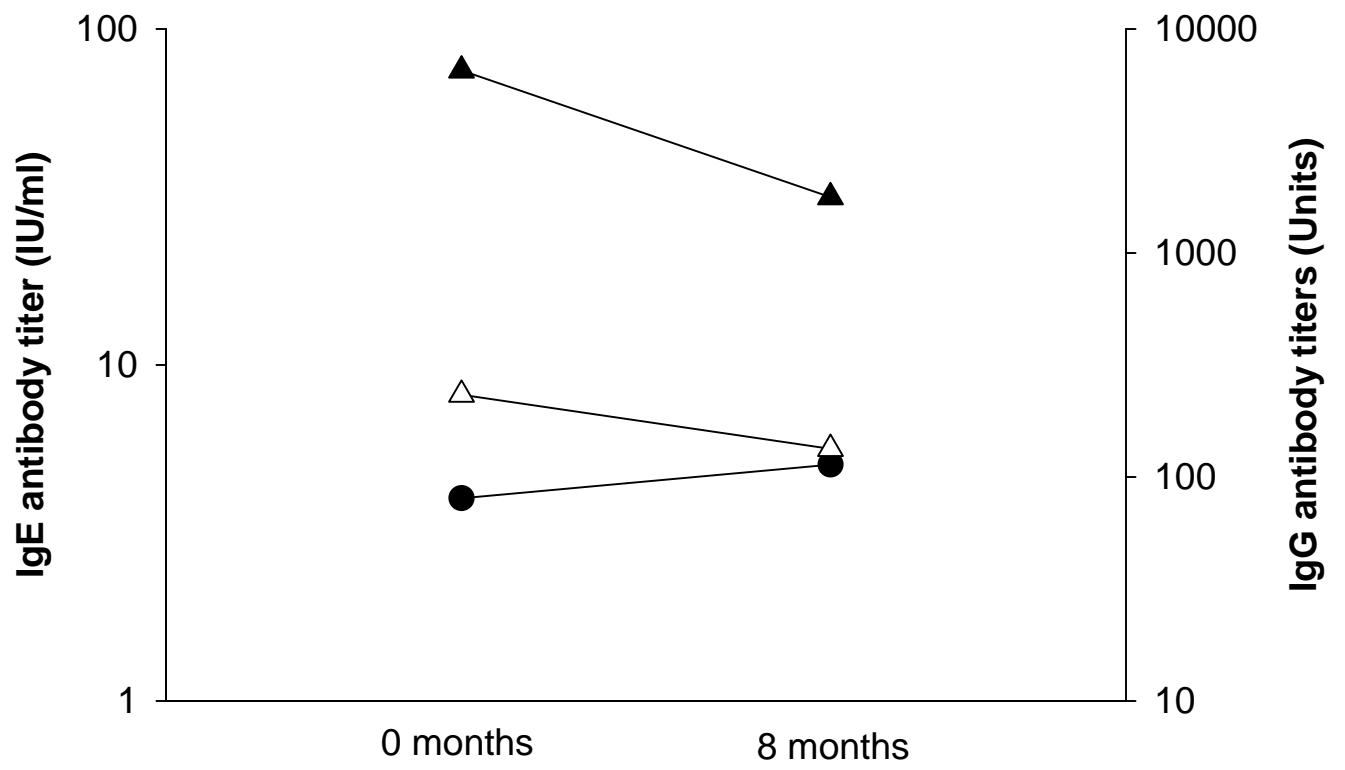

eFig 1B

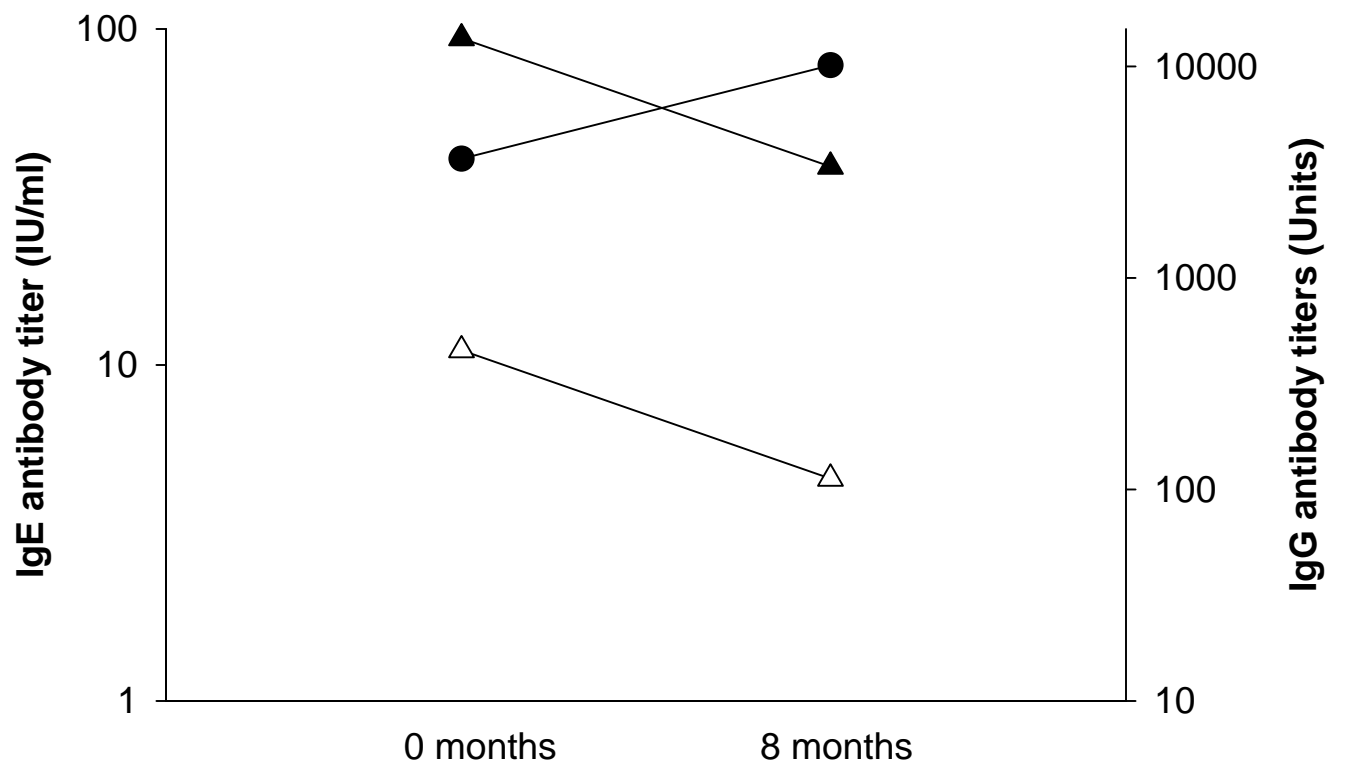

eFig 1C
